# Supplementary material for: The Delphi method to analyze the expert views on possible futures of the smart city adoption and development in developing countries: the case of Jordan
Source: PeerJ Comput Sci. 2024 May 27;10:e2061. doi: 10.7717/peerj-cs.2061 (PMC11157581; doi:10.7717/peerj-cs.2061)
Supplement: Data S1 [file peerj-cs-10-2061-s001.xlsx]

## Sheet: Sheet1
ID	Start time	Completion time	Email	Name	Your smart city domain	Job Position	Which smart city technologies do you believe have the greatest potential for success in the near future?	What, in your opinion, is the greatest obstacle to the widespread application of smart city technology and other critical issues facing smart cities today?	How do you think smart cities can best address issues related to energy efficiency and sustainability?	What are the most important factors that cities should consider when developing and implementing smart city technology?	How do you think smart cities can best address issues related to transportation and mobility?	How do you believe smart cities may effectively address concerns relating to citizen engagement and participation while maintaining the privacy and security of their residents?	How do you think smart cities can best address issues related to affordability and equity?	What are the most important areas of research and development that should be prioritized in the field of smart cities?	2
1	2023-03-28 14:12:37	2023-03-28 14:29:07	anonymous		Data analyst	Data analyst	Smart home	Financial issues	Smart cities could reduce energy consumption	Infrastructure stability Governance level Financial level	Can reduce the need transportation	I do not know	I do not know	Information security, data governance	I accept the terms and conditions.
2	2023-03-29 16:59:41	2023-03-29 17:05:34	anonymous		Academics & Education	Professor	Transportation	ICT Infrastructure	Reduce the overall costs	Policy, education, training, awareness, technology	Eliminate the traffic jam	Smart city will make the Lifestyle much easier	I have no idea	Acceptance	I accept the terms and conditions.
3	2023-03-31 17:47:16	2023-03-31 17:57:51	anonymous		Energy Efficiency	Energy Consultant	Renewable energy (Solar)	Lack of integrated funding solutions and lack of education to the end user.	Develop innovative funding programs to advance acceptance and installations.	Educate engage residential and commercial sectors. Develop and deliver workshops to include financial incentives by government, utilities and private sector.	Increase public transportation initiatives and build car free zones to encourage alternative mobility such as bicycles	Direct educational webinars and privacy protected surveys.	Government programs must evolve with funding schemes to address equity among citizens.	There is an abundance of technology available but it must be made affordable. Financial programs must be developed.	I accept the terms and conditions.
4	2023-04-01 00:52:19	2023-04-01 01:33:54	anonymous		Sustainability coordinator	Co-founder Jordan Green Building Council	Smart grids, ICT applications in energy and water efficiency, green infrastructure, e-mobility, climate-smart applications in urban agriculture.	Integrated planning, data and benchmarking, clear viable models for investment.	These issues need to be integrated in the planning process, setting targets and enforcing them, offering incentives for going beyond compliance, empowering local tech providers and enhancing collaborative culture across sectors, engaging private sector in defining viable projects to invest in, engaging community and anchoring ownership.	Technical and financial viability, affordability, localization and social impact.	Considering community needs and behaviors, connectivity, infrastructure constraints, affordability, and policies related to low emission transportation.	Awareness on data security and protection, consultation and feedback mechanisms.	Encourage innovation and local solutions, priorituze incentives for affordable housing sbf transport projects, subsidize costs conditional to social impact (e.g. projects that contribute to equity and sustainability), link support to low-income citizens with urban services.	Data analytics, multidisciplinary applied research, IoT in various sectors, urban climate solutions.	I accept the terms and conditions.
5	2023-04-04 20:58:08	2023-04-04 22:08:23	anonymous		Energy Efficiency	Assistant Professor	Water Conservation Technology, Smart Parking Spots, Alternative Transportation, Smart Traffic System and environmental management system	Security issues and regulations	integrating systems and making buildings more intelligent. Smart cities can benefit from intelligent roads, smart lights, smart parking spaces, and smart traffic lights	An infrastructure based around technology. Environmental initiatives. Effective and highly functional public transportation. Society culture	By investing in public transport innovation to improve safety, deliver affordable mobility services,	This can be achieved through: 1. Limiting access to data, giving privileges only to those directly responsible for it. 2. Ensure that all IoT devices, data banks, and connected platforms have high-level cyber security. 3. Ensure that no personally identifiable information is accessible to the general public.	allowing citizens to invest in local solar plants	smart mobility, smart living, smart environment, smart citizens, smart government, and smart architecture as well as related technologies	I accept the terms and conditions.
6	2023-04-12 00:09:32	2023-04-12 01:19:25	anonymous		Academics & Education	Assistant Professor	Smart energy cities	Privacy and security issues	By focusing on media coverage and marketing this new idea to the public and private sectors who can support such projects financially and effectively.	Population Security and privacy of the public	Using of AI technology in driving transportation systems and apply it in some cities as a pilot study. The results of such studies can help in understanding these challenges and developing these systems.	Asking people about their thoughts and involve them in some pilot studies related to the smart technology cities	Marketing	AI involvement, safety, financial security	I accept the terms and conditions.
7	2023-04-13 11:11:51	2023-04-13 11:28:25	anonymous		Academics & Education	Professor	Traffic, energy, transportation	Infrastructure	Metering energy and water consumption and optimizing it	Direct effect on people and reducing expenditure	Controling traffic lights and timing to increase the traffic flow in congested areas.	I am not sure	I am not sure	Water metering Transportation	I accept the terms and conditions.
8	2023-04-19 14:48:56	2023-04-19 15:10:49	anonymous		Urban Planning		Self-Driving Cars Transportation Traffic System Management	Old infrastructure Data & privacy Citizen engagement	The building blends engineering, architecture and technology to incorporate sustainable design features and energy performance metrics. Carbon dashboards have been installed throughout showing energy consumption, raising awareness and putting staff in a position to improve a building's energy performance.	policy and regulation infrastructure people	Traffic system technology will create safer and more livable cities. It can reduce operational silos between traffic systems and emergency personnel, integrate centralized command centers and allow us to implement smart sensors. This will allow quicker emergency response times, which could be the difference between life and death.	When asked what the most critical requirement for a smart city is, citizen engagement leads the pack, second only to data sharing. This of course, comes as no surprise. For smart cities to be truly “smart,” they need locals to take advantage of the technologies and infrastructure at their disposal and use them to improve their quality of life. How else will cities learn what citizens want and nee…	The key issues determining the relation between Smart city and affordability include the extent of active municipal intervention, redistributional considerations and the historic importance of inclusion and equity in urban development.	Transportation	I accept the terms and conditions.
9	2023-04-27 13:41:43	2023-04-27 13:58:39	anonymous		Smart city project management	Assistant Professor	Water Conservation Technology	The limited and often reducing financial resources for providing governance and various services is one of the most challenging barriers in implementing smart cities projects. Additionally, it is often hard to understand the real benefits and costs of investments and evaluate their life cycle impacts in the long term.	In smart cities, both residential and commercial buildings are more efficient and use less energy. The consumption of energy is analyzed, data are collected and power production is optimized through different sources and distributed energy production. Proper energy management requires accurate metering.	I think: Data Is the foundation, facilitating IoT connectivity, modular Infrastructure, security and distributed data processing.	I guess by: intelligent traffic management services such as change of traffic light phases, road user information, and dynamic changes in traffic capacity.	A smart city uses information and communication technology (ICT) to improve operational efficiency, share information with the public and provide a better quality of government service and citizen welfare.	I don't have an idea.	Amman, Al_zarqa.	I accept the terms and conditions.
10	2023-05-08 13:25:05	2023-05-08 13:33:54	anonymous		Academics & Education	Researcher	In a smart city, autonomous vehicles can be used to reduce traffic congestion, improve public transportation, and enhance public safety.	One of the biggest challenges facing smart cities is funding. Implementing smart city technologies can be expensive, and many cities may not have the budget to invest in them.	Smart cities can encourage the use of renewable energy sources such as solar, wind, and geothermal energy. This can be done by providing incentives to homeowners and businesses to install renewable energy systems, and by developing renewable energy infrastructure.	Sustainability: Smart city technologies should be designed with sustainability in mind to ensure that they are environmentally friendly and resource-efficient.	Smart cities can use ITS to optimize traffic flow, reduce congestion, and improve safety. ITS can include technologies such as intelligent traffic management systems, adaptive traffic signal systems, and smart parking systems.	Smart cities need to prioritize citizen engagement and participation while ensuring that privacy and security concerns are addressed. By implementing transparent data protection policies and involving citizens in the planning and implementation of smart city technologies, smart cities can build trust and create a more inclusive and participatory urban environment.	Smart cities need to consider the needs and perspectives of all citizens, regardless of their socioeconomic status, to ensure that their policies and technologies are equitable and accessible to all. By implementing innovative solutions that address affordability and equity issues, smart cities can create more inclusive and livable urban environments for all citizens.	AI has the potential to significantly enhance smart city technologies by analyzing vast amounts of data and providing insights that can improve efficiency and sustainability. Research should focus on developing AI algorithms that are transparent, ethical, and unbiased.	I accept the terms and conditions.
11	2023-05-09 17:16:59	2023-05-09 17:26:03	anonymous		Smart city project management		Computer and software technology	Funds	Get experience from other cities that totally or partly applied the tchnology	Funds Available experience	Use media to introduce people to the technology	Security in any information	This may require direct contact with experts	The experince others have. Good ir bad. Important to contact these	I accept the terms and conditions.
12	2023-05-09 17:34:34	2023-05-09 17:45:16	anonymous		Academics & Education	Assistant professor	Complete and comprehensive electronic forms and applications	Senior managers and employees who face difficulties in understanding the concept of smart city	By providing a real time monitoring of consumed energy and cost savings for the public	Public awareness marketing and strategic planning rather than unplanned ideas	By simulating the future of transportation and mobility and proposing the affordable alternatives and concqunses	Yes	By minimizing human interferences and bias decision	Transportation and green areas	I accept the terms and conditions.
13	2023-05-09 17:45:58	2023-05-09 17:49:44	anonymous		Academics & Education	Tutor	Dont know	Dont know	Dont know	Dont knowdont know	Dont know	Dont know	Do t know	Dont know	I accept the terms and conditions.
14	2023-05-16 16:46:07	2023-05-16 17:13:05	anonymous		Smart Transportation	Civil engineering	Neom	People's awareness and commitment	Not to depend on oil, they should rely on natural energy	Disparities in understanding human minds and the most important factor is simplicity	Not placing vital and governmental buildings in one area, and setting up a train network that includes the city. Encouraging vehicle sharing for more than one person, and there are too many ideas.	By good conduct of persons and strict laws	Equality in basic things and rights for people in the city	Infrastructure and ease of communication and communication with anyone in the city, whether to conduct a specific transaction or do something	I accept the terms and conditions.
15	2023-05-17 10:59:52	2023-05-17 11:42:55	anonymous		Others	Civil Engineer	Transportation and agriculture	Funding and finding the most effective way to acheive and also the mindset of the people to believe in the new ideas	When there is a high technology systems in the city like transportation the people will reduce their using if their cars .. also when we start to use the renewable energy that will reduce the energy consumption and reduce the pollution	How to acheive the new technology projects if the city is already exist and occupied by people.	When the people start to feel and touch that there is no need to use my own car	When the people feel that they are safe and there privacy is respected they will be motivated to use the new technology of transportation	When all people (from all society levels) are useing the same service in the same way the equity will directly take a place in the social life of the people	The cities that have the most clear problems and need to be solved.. this will help you to know the direct results of your projects	I accept the terms and conditions.
16	2023-05-17 17:33:00	2023-05-17 18:02:48	anonymous		Urban Planning	project manager	Keeping pace with the development of internet networks and also relying on artificial intelligence tools in building smart cities	Developed infrastructure and appropriate community environment	Using smart meters to track energy usage in real time. This information can be used to identify areas where energy is being wasted and to implement measures to reduce consumption.	Cost: Smart city technology can be expensive to implement and maintain. Cities need to make sure that the benefits of smart city technology outweigh the costs.	Developing smart parking systems. Smart parking systems can help drivers to find available parking spaces more easily, which can help to reduce traffic congestion.	N/A	Be transparent about how data is being collected and used. Cities should provide clear and concise information about how they are collecting and using data from smart city technology. This information should be easy to understand and should be available to everyone.	Sustainability: Smart cities should be designed to be sustainable and to reduce the city's environmental impact. This includes using renewable energy sources, energy-efficient buildings, and sustainable transportation systems.	I accept the terms and conditions.
17	2023-05-18 15:00:19	2023-05-18 15:39:06	anonymous		Academics & Education	Assistant Professor Structural Engineering	Artificial Intelligence (AI)	Privacy of customers.	Smart cities have better response to emergencies and traffic control.	Open data and interconnectivity.	Apps for smart cities designed to control traffic and response to issues in real time.	by enforcing privacy laws on corporations for the usage personal data.	Providing better access to education, transportation, jobs.	Sustainability will be prioritized, using green technologies, energy-efficient buildings, and sustainable transportation systems.	I accept the terms and conditions.
18	2023-05-20 19:34:52	2023-05-20 19:48:51	anonymous		Smart Transportation	Master Student	Smart city technologies with the greatest potential for success in the near future include IoT sensors and devices, 5G networks, artificial intelligence, blockchain, and augmented/virtual reality. These technologies can improve city operations, enhance citizen services, and promote sustainable development.	In my opinion, the greatest obstacle to the widespread application of smart city technology is the lack of standardization and interoperability between different systems and technologies, as well as issues related to data privacy and security, digital divide, governance, and public engagement.	Smart cities can best address energy efficiency and sustainability by adopting renewable energy, deploying energy management systems, implementing smart grids, encouraging sustainable transportation, incorporating green infrastructure, and engaging citizens in sustainable behavior.	Cities should consider citizen needs, data privacy and security, interoperability and scalability, collaboration and partnerships, and funding and financing when developing and implementing smart city technology.	Smart cities can address issues related to transportation and mobility by employing technologies such as intelligent traffic management systems, connected and autonomous vehicles, and integrated public transportation networks. Additionally, smart cities can encourage sustainable modes of transportation such as biking and walking, and implement policies that promote shared mobility options. To mai…	Smart cities can effectively address concerns relating to citizen engagement and participation while maintaining the privacy and security of their residents by implementing policies and technologies that prioritize transparency, informed consent, and data protection. This can include measures such as clear communication about data collection and use, anonymization of personal information, and str…	Smart cities can address issues related to affordability and equity by prioritizing the needs of low-income communities and ensuring that smart city technologies and services are accessible to all residents. This can be achieved by implementing policies that promote affordable housing, investing in public transportation, providing access to digital services and technologies, and engaging with com…	Areas of research and development that should be prioritized in the field of smart cities include IoT infrastructure, data analytics and AI, energy efficiency and sustainability, mobility and transportation, citizen engagement and participation, cybersecurity and privacy, and resilience and disaster management.	I accept the terms and conditions.
